# Supplementary material for: Energetic and physical limitations on the breaching performance of large whales
Source: eLife. 2020 Mar 11;9:e51760. doi: 10.7554/eLife.51760 (PMC7065846; doi:10.7554/eLife.51760)
Supplement: Figure 5—source data 1. [file elife-51760-fig5-data1.csv]

id	species	start_acceleration_frame	exit_frame	start_depth_(m)	exit_vel_OCDR_(m/s)	exit_pitch_(deg)	exit_roll_(deg)	stroke_count	avg_stroke_duration_(s)	duration_acc_(s)	measured_length_(m)	emergence_(%)	trajectory_shape
mn151013-7	mn	37100	37196	34.7	8.20	61	-166	5.6	2.10	9.6	nan	82.1	I
mn151018-3	mn	100895	100995	40.0	7.33	58	-208	5.6	2.45	10.0	13.70	75.1	I
mn160429-37	mn	301845	301929	39.9	7.30	63	-185	5.6	1.53	8.4	nan	72.5	v
mn160725-36b	mn	78092	78140	13.5	5.43	53	-252	3.4	1.53	4.8	nan	56.8	v
mn161004-36	mn	110151	110240	25.0	6.56	46	-140	5.6	1.67	8.9	nan	71.8	I
mn161117-180423	mn	165876	165967	30.6	6.06	77	-119	4.7	2.42	9.1	12.71	60.9	I
mn170612-10b	mn	643089	643200	47.0	8.83	47	-194	nan	nan	11.1	nan	96.0	I
mn170612-21	mn	100458	100507	16.7	8.89	42	-227	3.4	1.50	4.9	nan	100.1	v
mn170612-613	mn-calf	146361	146426	16.8	4.95	70	-166	nan	nan	6.5	nan	70.5	j
mn170612-613	mn-calf	216654	216700	15.2	6.21	61	-185	4.2	1.15	4.6	nan	90.8	v
mn170612-613	mn-calf	216876	216921	18.4	6.35	63	-215	3.9	1.28	4.5	nan	92.7	v
mn170612-613	mn-calf	217162	217223	19.6	5.94	60	-201	4.7	1.36	6.1	nan	87.4	v
mn170612-613	mn-calf	217537	217556	11.1	6.96	39	-164	1.5	0.90	1.9	nan	119.0	v
mn170612-613	mn-calf	218524	218587	4.6	1.81	67	-345	2.2	3.25	6.3	nan	26.0	u
mn170612-613	mn-calf	218672	218723	6.2	2.33	74	-338	1.7	3.70	5.1	nan	32.8	u
mn170612-613	mn-calf	218989	219040	6.0	2.57	57	-320	1.8	3.40	5.1	nan	38.4	u
mn170612-613	mn-calf	219792	219857	7.1	2.67	56	-3	2.7	3.23	6.5	nan	40.1	u
mn170612-613	mn-calf	219952	219994	12.0	4.65	59	-93	3.2	1.43	4.2	nan	68.7	v
mn170612-613	mn-calf	223887	223928	13.6	5.06	66	-249	3.1	1.43	4.1	nan	73.0	v
mn170612-613	mn-calf	228323	228423	18.5	5.39	52	-133	4.9	2.24	10.0	nan	82.7	I
mn170612-613	mn-calf	229643	229718	18.8	4.82	56	-265	4.9	1.58	7.5	nan	72.4	I
mn170612-613	mn-calf	232490	232590	19.5	6.44	57	-107	nan	nan	10.0	nan	96.4	I
mn170612-613	mn-calf	236910	237050	33.8	7.01	38	-159	8.2	1.73	14.0	nan	120.3	I
mn170612-613	mn-calf	238434	238540	45.3	7.57	61	-210	8.8	1.19	10.6	nan	111.2	v
mn170612-613	mn-calf	238782	238827	19.2	6.85	42	-219	3.2	1.30	4.5	nan	113.5	v
mn170612-613	mn-calf	147142	147287	53.8	5.80	68	-178	7.7	1.98	14.5	nan	83.1	j
mn170612-613	mn-calf	147479	147539	17.6	5.10	60	-173	4.2	1.50	6.0	nan	74.8	v
mn170612-613	mn-calf	147736	147790	17.2	5.45	71	-169	4.3	1.40	5.4	nan	77.2	v
mn170612-613	mn-calf	148041	148100	7.7	3.65	41	-317	2.5	2.65	5.9	nan	60.8	u
mn170612-613	mn-calf	148186	148242	7.2	3.40	52	-325	2.1	3.15	5.6	nan	52.1	u
mn170612-613	mn-calf	148311	148354	7.0	3.40	55	-328	1.6	3.20	4.3	nan	51.5	u
mn170612-613	mn-calf	148425	148466	5.6	3.01	59	-343	1.8	3.50	4.1	nan	44.5	u
mn170612-613	mn-calf	148549	148605	5.6	2.74	57	-20	2.0	3.50	5.6	nan	40.9	u
mn170612-613	mn-calf	148693	148747	6.9	3.36	49	-54	2.2	2.95	5.4	nan	52.3	u
mn170612-613	mn-calf	148820	148864	5.7	3.26	51	-43	2.3	2.35	4.4	nan	50.5	u
mn170612-613	mn-calf	148942	148999	6.1	2.91	56	-10	2.1	3.20	5.7	nan	43.6	u
mn170612-613	mn-calf	149074	149119	5.8	2.99	55	-5	2.1	2.75	4.5	nan	45.0	u
mn170612-613	mn-calf	149203	149251	5.4	2.76	54	-41	1.7	3.65	4.8	nan	42.1	u
mn170612-613	mn-calf	149337	149385	5.3	2.65	60	-12	1.7	3.40	4.8	nan	38.9	u
mn170612-613	mn-calf	149472	149525	5.7	2.70	55	-10	2.1	2.95	5.3	nan	40.7	u
mn170612-613	mn-calf	149607	149654	6.2	3.31	49	-31	1.7	3.70	4.7	nan	51.6	u
mn170612-613	mn-calf	149736	149791	6.5	2.97	51	-72	1.8	4.55	5.5	nan	45.9	u
mn170612-613	mn-calf	149882	149925	4.5	2.70	59	-24	1.5	3.35	4.3	nan	40.0	u
mn170612-613	mn-calf	150003	150054	5.2	2.79	48	-63	2.0	3.00	5.1	nan	44.1	u
mn170612-613	mn-calf	150139	150196	5.9	2.64	64	-10	2.0	3.70	5.7	nan	38.4	u
mn170612-613	mn-calf	150268	150309	5.1	3.04	50	-49	2.1	2.30	4.1	nan	47.3	u
mn170612-613	mn-calf	150389	150435	6.0	3.24	57	-21	1.7	3.50	4.6	nan	48.4	u
mn170612-613	mn-calf	150524	150572	5.0	2.74	58	-11	2.2	2.80	4.8	nan	40.8	u
mn170612-613	mn-calf	150641	150693	4.9	2.58	59	-6	1.8	4.05	5.2	nan	38.1	u
mn170612-613	mn-calf	150772	150822	4.7	2.32	53	-15	2.0	3.15	5.0	nan	35.4	u
mn170612-613	mn-calf	150901	150946	5.8	3.23	52	-12	2.2	2.60	4.5	nan	49.7	u
mn170612-613	mn-calf	151035	151097	6.3	2.39	64	-8	1.9	3.60	6.2	nan	34.8	u
mn170612-613	mn-calf	151184	151240	5.8	2.54	55	-13	2.1	3.25	5.6	nan	38.4	u
mn170612-613	mn-calf	151302	151351	4.9	2.47	64	-350	1.8	3.60	4.9	nan	35.9	u
mn170612-613	mn-calf	151444	151497	5.0	2.51	51	-19	2.1	3.05	5.3	nan	38.9	u
mn170612-613	mn-calf	151561	151602	5.4	2.91	56	-44	1.6	2.55	4.1	nan	43.8	u
mn170612-613	mn-calf	151676	151721	5.4	2.54	57	-358	1.7	3.25	4.5	nan	37.8	u
mn170612-613	mn-calf	151798	151848	5.7	2.67	58	-3	2.2	2.80	5.0	nan	39.6	u
mn170612-613	mn-calf	151934	152000	5.9	2.59	54	-3	2.5	4.67	6.6	nan	39.3	u
mn170612-613	mn-calf	158342	158392	7.6	nan	24	-88	1.9	2.95	5.0	nan	nan	u
mn170612-613	mn-calf	158499	158568	6.7	nan	21	-95	2.1	3.90	6.9	nan	nan	u
mn170612-613	mn-calf	158957	159007	7.0	nan	19	-101	1.7	3.50	5.0	nan	nan	u
mn170612-613	mn-calf	159249	159309	7.3	4.63	34	-81	2.8	2.87	6.0	nan	82.7	u
mn170612-613	mn-calf	160014	160077	6.2	nan	27	-81	2.4	2.95	6.3	nan	nan	u
mn170612-613	mn-calf	160345	160422	8.2	nan	21	-76	3.0	3.10	7.7	nan	nan	u
mn170612-613	mn-calf	161376	161419	4.7	3.65	36	-50	1.9	3.00	4.3	nan	63.5	u
mn170612-613	mn-calf	161526	161569	14.7	nan	21	-175	4.0	1.18	4.3	nan	nan	v
mn170612-613	mn-calf	161715	161769	8.5	3.31	58	-66	2.1	2.80	5.4	nan	49.2	u
mn170612-613	mn-calf	161851	161896	4.8	3.74	35	-52	2.0	2.75	4.5	nan	66.4	u
mn170612-613	mn-calf	161992	162036	5.1	3.79	31	-59	1.2	4.40	4.4	nan	69.8	u
mn170612-613	mn-calf	162121	162166	6.1	4.52	34	-52	2.1	2.55	4.5	nan	81.0	u
mn170612-613	mn-calf	162239	162282	6.6	5.08	33	-54	2.1	2.35	4.3	nan	91.7	u
mn170612-613	mn-calf	162354	162395	6.5	4.48	38	-55	2.0	2.60	4.1	nan	76.6	u
mn170612-613	mn-calf	162489	162545	7.4	nan	26	-64	2.1	3.10	5.6	nan	nan	u
mn170612-613	mn-calf	162641	162700	6.2	3.49	38	-60	1.8	3.55	5.9	nan	59.8	u
mn170612-613	mn-calf	162826	162876	5.3	3.47	34	-47	1.9	3.45	5.0	nan	62.2	u
mn170612-613	mn-calf	162978	163034	7.0	3.33	47	-49	2.1	3.35	5.6	nan	52.7	u
mn170615-30	mn	65868	65927	23.5	5.48	61	-277	3.8	1.70	5.9	nan	54.8	v
mn170615-40b	mn	540553	540652	51.7	8.78	57	-190	6.4	1.58	9.9	nan	89.6	j
mn170809-51	mn	290815	290876	10.5	3.19	64	-191	3.7	2.38	6.1	nan	31.5	I
mn170810-30	mn	205116	205166	3.8	3.12	35	-20	2.6	2.23	5.0	14.76	36.7	u
mn170810-30	mn	205285	205350	18.6	5.45	62	-152	2.5	2.80	6.5	14.76	52.7	v
mn170810-30	mn	225768	225895	38.3	8.11	53	-212	6.7	2.14	12.7	14.76	82.3	I
mn170815-20	mn	183814	183878	13.7	5.59	54	-23	3.9	1.93	6.4	11.19	65.3	I
mn170815-20	mn	183997	184041	13.1	nan	14	-51	nan	nan	4.4	11.19	nan	v
mn170908-44	mn	53255	53340	31.7	8.19	51	-228	4.9	2.14	8.5	nan	86.4	j
mn180227-40	mn	348128	348209	31.2	7.07	80	-186	5.4	1.64	8.1	10.48	78.5	v
mn180423-40	mn	407802	407902	20.8	7.40	56	-208	6.7	1.63	10.0	nan	76.0	I
mn161117-180423	mn	131760	131820	12.8	4.55	50	-178	3.2	2.20	6.0	12.71	50.7	I
mn161117-180423	mn	278942	278988	19.2	7.03	62	-192	2.8	1.80	4.6	12.71	73.9	v
mn161117-180423	mn	401550	401640	18.8	5.55	70	-201	4.3	2.40	9.0	12.71	56.5	v
mn161117-180423	mn	418424	418561	12.7	3.53	38	-353	4.0	3.80	13.7	12.71	43.9	I
mn180424-11	mn	180010	180118	8.6	6.56	50	-135	5.8	2.33	10.8	nan	69.4	I
mn180607-45	mn	506523	506607	31.1	8.20	35	-186	5.9	1.62	8.4	nan	99.1	v
mn180607-45	mn	513633	513696	23.8	6.78	58	-172	4.5	2.42	6.3	nan	68.6	I
mn180620-45	mn	366567	366627	20.2	6.67	62	-229	3.6	2.70	6.0	nan	66.4	I
mn180620-45	mn	366737	366789	13.3	5.35	58	-228	2.7	2.27	5.2	nan	54.2	v
mn180620-45	mn	366935	366993	17.3	4.78	78	-268	1.7	4.15	5.8	nan	45.5	v
mn180620-45	mn	367151	367214	15.0	3.92	74	-247	1.7	4.85	6.3	nan	37.5	v
mn180620-45	mn	367366	367458	14.4	3.03	70	-236	2.3	4.65	9.2	nan	29.2	v
mn180620-45	mn	367740	367800	9.6	3.48	58	-351	1.7	3.85	6.0	nan	35.2	j
mn180620-45	mn	371321	371441	38.8	7.61	77	-189	5.6	3.02	12.0	nan	72.5	I
mn180620-45	mn	371864	371958	35.2	6.86	62	-283	5.0	2.12	9.4	nan	68.4	v
mn181002-47	mn	248702	248772	21.9	6.12	65	-131	nan	nan	7.0	nan	60.2	I
mn181002-47	mn	250425	250483	25.5	7.92	52	-145	nan	nan	5.8	nan	82.9	v
mn181002-47	mn	251753	251816	28.2	7.67	53	-146	nan	nan	6.3	nan	79.9	I
mn181002-47	mn	258079	258159	29.1	6.90	57	-212	3.8	2.75	8.0	nan	70.5	v
mn181002-47	mn	259387	259472	39.2	6.85	66	-154	4.5	1.98	8.5	nan	67.2	j
bb180125-30	bb	50792	50904	2.6	3.10	42	-170	5.9	1.90	11.2	nan	48.1	u
bb180125-30	bb	50960	50996	4.5	3.14	43	-103	2.1	1.75	3.6	nan	48.4	u
bb180125-30	bb	51060	51115	6.2	3.35	39	-153	2.8	1.87	5.5	nan	53.4	u
bb180125-30	bb	51180	51294	5.5	1.69	55	-130	7.1	1.50	11.4	nan	24.1	u
bb180125-30	bb	51362	51408	4.7	2.92	56	-197	2.6	1.93	4.6	nan	41.2	u
bb180125-30	bb	51465	51521	4.6	2.72	52	-184	3.8	1.68	5.6	nan	39.2	u
bb180125-30	bb	51576	51626	4.4	3.43	54	-171	2.8	1.77	5.0	nan	49.0	u
bb180125-30	bb	51679	51708	4.6	3.16	64	-161	2.3	1.45	2.9	nan	43.1	u
bb180125-30	bb	51787	51837	5.5	nan	26	-37	nan	nan	5.0	nan	nan	u
bb180125-30	bb	52699	52805	4.5	2.13	52	-128	5.3	1.72	10.6	nan	30.9	u
bb180125-30	bb	52871	52906	3.9	2.92	49	-150	2.0	2.00	3.5	nan	42.9	u
bb180125-30	bb	53005	53090	18.3	3.38	66	-143	4.4	2.05	8.5	nan	45.8	v
bb180125-30	bb	53130	53230	2.4	3.05	46	-209	5.4	1.88	10.0	nan	45.7	u
bb180125-30	bb	53306	53363	5.6	2.59	61	-147	2.8	2.20	5.7	nan	35.9	u
bb180125-30	bb	53483	53601	20.3	3.22	58	-183	6.0	2.03	11.8	nan	44.9	v
bb180125-30	bb	53704	53770	5.6	3.31	48	-224	2.6	2.43	6.6	nan	49.1	u
bb180125-30	bb	53847	53880	5.3	2.42	47	-305	1.7	2.70	3.3	nan	36.0	u
bb180304-45	bb	80539	80604	7.4	1.57	66	-233	3.6	2.85	6.5	8.64	20.1	v
bb180304-45	bb	87011	87062	5.3	2.23	54	-113	2.6	2.03	5.1	8.64	30.1	u
bb180304-45	bb	87333	87432	4.6	1.81	45	-59	nan	nan	9.9	8.64	25.9	u
bb180304-45	bb	88802	88897	12.0	2.32	59	-136	3.6	3.05	9.5	8.64	30.6	I
bb180304-45	bb	94415	94597	20.6	2.76	64	-122	7.5	2.57	18.2	8.64	35.6	v
er150417-3	er	3092	3171	5.1	3.71	23	-356	2.8	3.07	7.9	nan	58.4	u
pm10_222a	pm	111657	111708	23.1	6.25	63	300	5.6	2.17	10.2	nan	70.6	v
pm10_222a	pm	111824	111849	21.1	nan	20	119	3.6	1.60	5.0	nan	nan	v
pm10_222a	pm	112034	112070	16.6	6.54	46	140	3.4	2.20	7.2	nan	81.7	v
pm10_222b	pm	272012	272052	15.2	4.21	57	89	3.7	2.45	8.0	nan	48.8	j
pm10_222b	pm	272094	272125	12.0	4.40	39	277	2.1	3.40	6.2	nan	58.4	v
pm10_227a	pm	38387	38422	29.2	5.73	70	39	4.5	1.55	7.0	nan	63.0	v
rw09_115a	rw	185507	185795	30.6	3.82	36	64	5.4	2.28	11.5	nan	45.6	I
rw09_115a	rw	186047	186225	13.3	2.22	47	269	3.5	2.45	7.1	nan	24.1	v
rw09_115a	rw	186357	186530	10.1	2.57	45	358	2.0	3.70	6.9	nan	28.2	v
rw10_094b	rw	185537	185780	29.3	3.55	68	163	nan	nan	9.7	nan	34.5	I
mn06_188	mn	15036	15094	12.9	2.57	62	175	nan	nan	11.6	nan	25.7	v
mn10_133	mn	53026	53062	32.0	5.99	68	4	nan	nan	7.2	nan	58.3	v
mn10_133	mn	53214	53261	27.3	5.47	49	34	nan	nan	9.4	nan	58.4	v
mn11_055	mn-calf	5171	5195	7.2	4.37	51	150	4.6	1.28	4.8	nan	67.8	v
mn11_055	mn-calf	5246	5260	6.3	4.59	51	110	2.5	1.00	2.8	nan	71.3	u
mn11_055	mn-calf	5334	5353	6.7	2.70	73	226	2.7	1.27	3.8	nan	38.1	v
mn11_055	mn-calf	5410	5429	3.9	1.84	67	347	2.6	2.13	3.8	nan	26.4	u
mn11_055	mn-calf	5564	5578	5.5	3.90	46	147	2.8	1.13	2.8	nan	62.4	u
mn11_055	mn-calf	5653	5683	2.6	2.27	54	57	3.1	1.80	6.0	nan	34.4	u
mn11_055	mn-calf	5858	5883	5.4	3.08	65	91	nan	nan	5.0	nan	44.7	u
mn11_055	mn-calf	5936	5971	1.8	1.55	82	40	3.3	2.33	7.0	nan	21.5	u
mn11_055	mn-calf	6126	6154	2.0	2.46	55	79	3.8	1.75	5.6	nan	37.2	u
mn11_055	mn-calf	6269	6299	4.1	2.75	50	18	4.0	1.65	6.0	nan	42.6	u
mn11_055	mn-calf	6789	6822	3.5	2.64	55	87	nan	nan	6.6	nan	40.0	u
mn11_055	mn-calf	6916	6950	4.2	2.21	59	98	3.7	1.95	6.8	nan	32.7	u
mn11_055	mn-calf	7987	8000	2.8	1.56	75	171	nan	nan	2.6	nan	21.9	u
mn11_055	mn-calf	8917	8934	7.5	4.59	51	115	3.2	1.07	3.4	nan	71.2	v
mn11_055	mn-calf	9120	9134	5.3	2.81	70	293	2.5	1.10	2.8	nan	40.0	u
mn11_055	mn-calf	9325	9341	4.7	2.35	59	134	2.4	1.50	3.2	nan	34.8	u
mn11_055	mn-calf	10648	10736	31.3	5.00	53	192	10.7	1.68	17.6	nan	76.4	j
mn11_055	mn-calf	14053	14072	8.8	4.57	52	133	3.6	1.10	3.8	nan	70.1	v
mn11_055	mn-calf	14264	14279	4.0	2.57	52	234	2.1	1.50	3.0	nan	39.5	u
mn11_055	mn-calf	14385	14403	4.7	1.73	70	291	2.5	1.60	3.6	nan	24.6	u
mn11_055	mn-calf	14535	14556	5.0	3.34	36	197	2.6	1.53	4.2	nan	58.4	u
mn11_055	mn-calf	14734	14748	3.4	2.50	49	235	1.8	1.70	2.8	nan	39.1	u
mn11_055	mn-calf	16458	16473	5.6	2.79	67	257	2.6	1.27	3.0	nan	40.1	u
mn11_055	mn-calf	16546	16558	3.4	2.89	47	147	nan	nan	2.4	nan	46.0	u
mn11_055	mn-calf	17021	17035	6.7	3.87	63	176	2.8	1.07	2.8	nan	56.4	v
mn11_055	mn-calf	17503	17519	3.0	2.15	42	181	nan	nan	3.2	nan	35.6	u
mn11_055	mn-calf	19536	19567	18.1	5.61	54	188	6.9	0.91	6.2	nan	85.5	v
mn11_055	mn-calf	19630	19644	5.4	3.84	46	211	2.3	1.20	2.8	nan	61.3	u
mn11_055	mn-calf	19738	19751	2.9	2.04	49	189	1.6	2.20	2.6	nan	32.0	u
mn11_055	mn-calf	19962	19978	7.9	5.53	44	166	3.2	1.00	3.2	nan	90.2	u
mn11_055	mn-calf	20081	20097	4.5	3.44	43	145	2.3	1.40	3.2	nan	56.4	u
mn11_055	mn-calf	20200	20212	2.9	2.06	57	241	1.8	1.70	2.4	nan	30.9	u
mn11_055	mn-calf	20323	20336	3.6	2.34	54	136	1.4	2.00	2.6	nan	35.5	u
mn11_055	mn-calf	20721	20731	1.9	1.73	49	173	1.1	2.00	2.0	nan	27.0	u
mn11_055	mn-calf	21982	22019	3.1	1.12	35	92	2.6	3.13	7.4	nan	19.8	u
mn180626-47	mn	51694	51773	6.6	4.06	44	-352	2.7	4.00	7.9	nan	45.1	v
mn180626-47	mn	123630	123680	6.9	4.03	44	-353	1.9	3.85	5.0	nan	44.5	I
mn180831-30	mn-calf	54952	55007	13.0	6.48	36	-261	3.7	1.85	5.5	7.82	106.7	v
mn180831-30	mn-calf	148916	148996	26.9	6.43	69	-167	5.5	1.40	8.0	7.82	85.9	j
mn181002-45	mn	325005	325088	20.7	4.02	34	-266	4.6	2.22	8.3	12.30	52.6	I
mn180624-42	mn	46036	46136	34.0	7.11	67	-211	4.9	2.60	10.0	nan	69.4	I
be180418-42	be	294371	294440	11.6	5.74	24	-1	nan	nan	6.9	nan	85.0	v
be180418-42	be	298860	298898	12.9	4.82	59	-195	nan	nan	3.8	nan	50.6	v
